# Supplementary material for: A novel β-FeOOH/NiO composite material as a potential catalyst for catalytic ozonation degradation of 4-chlorophenol
Source: Royal Society of Chemistry journal article supplement (doi:10.1039/c5ra09177b), 2015-01-01

### MS Spectrum results for 4CP t=0 min

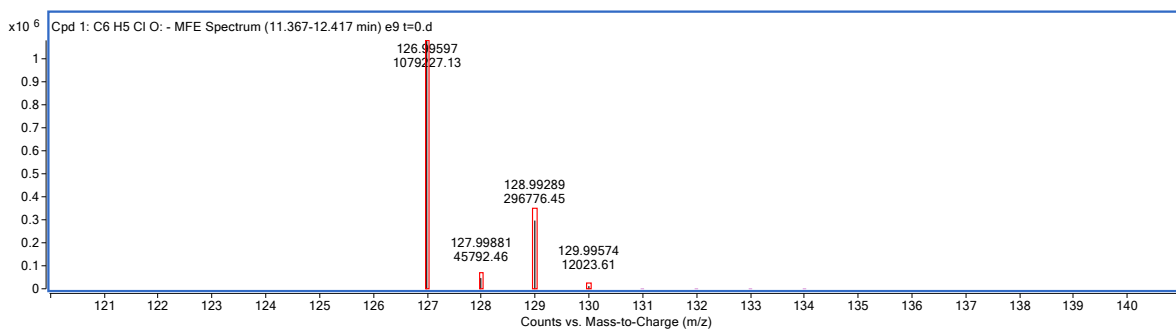

### TIC chromatogram for 4CP t=0mins

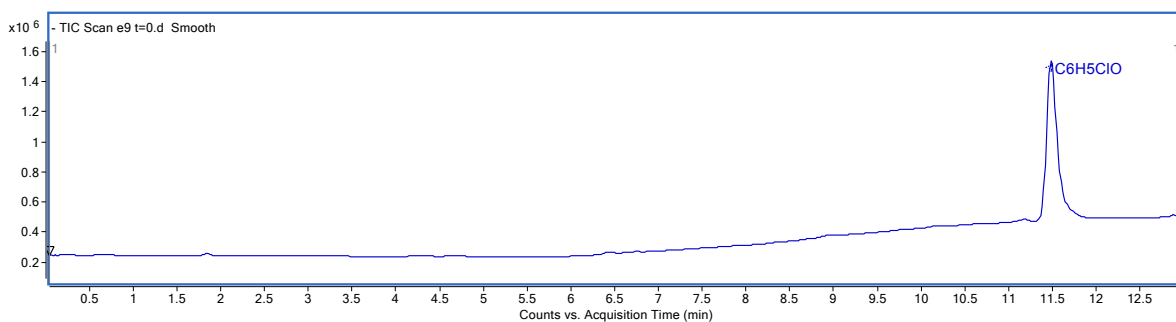

### DAD t = 0 min

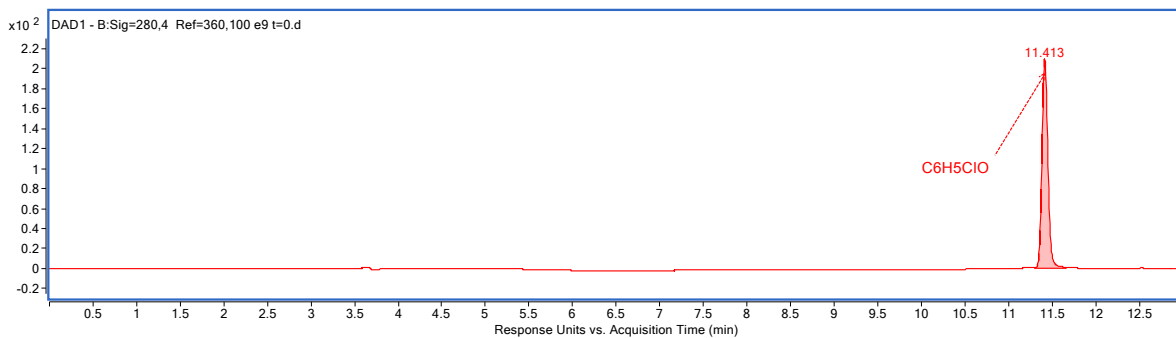

# Results for 5 minutes

## MS spectrum for intermediate product C6H5ClO2

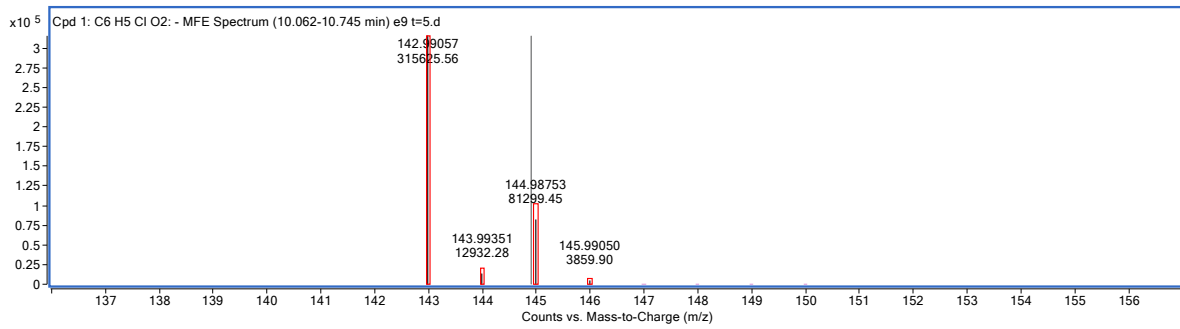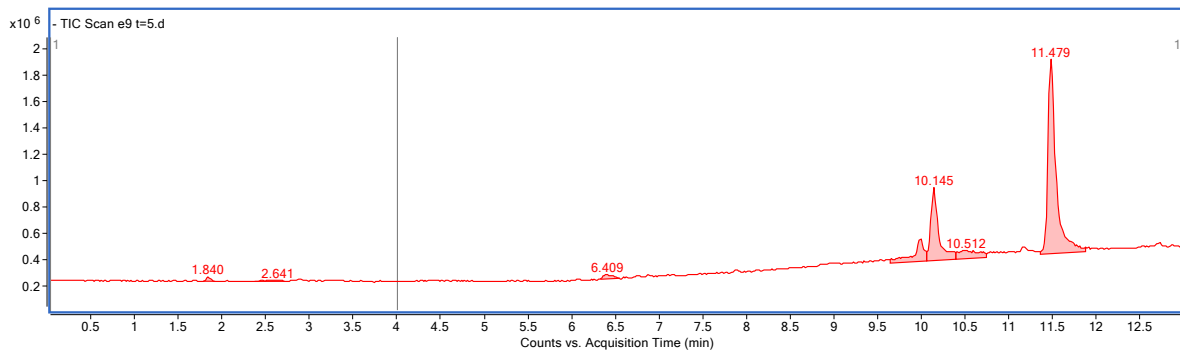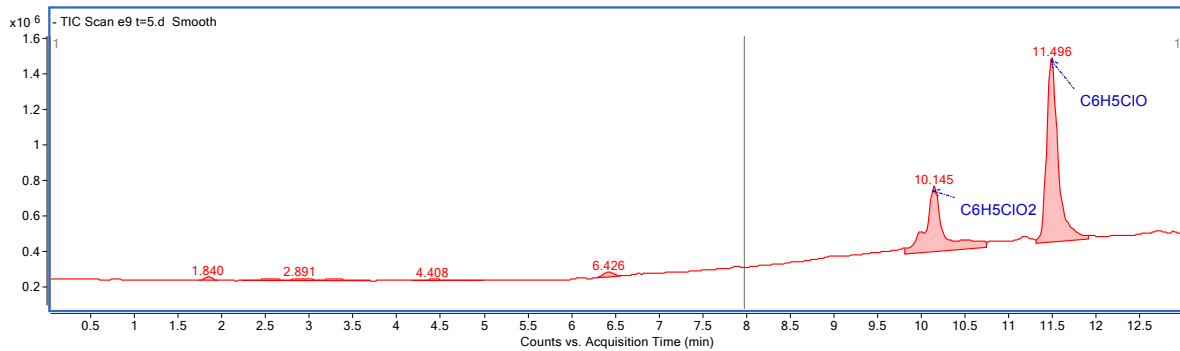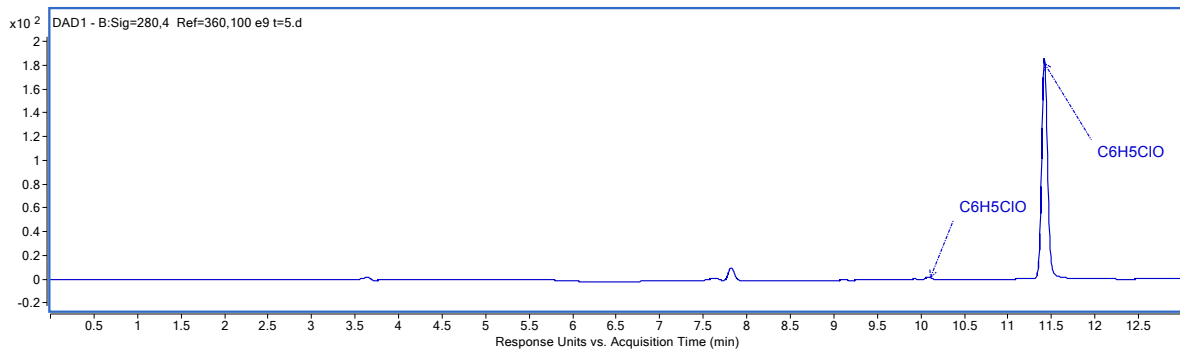

# Results after 10 minutes

## MS Spectrum for 10 minutes compounds

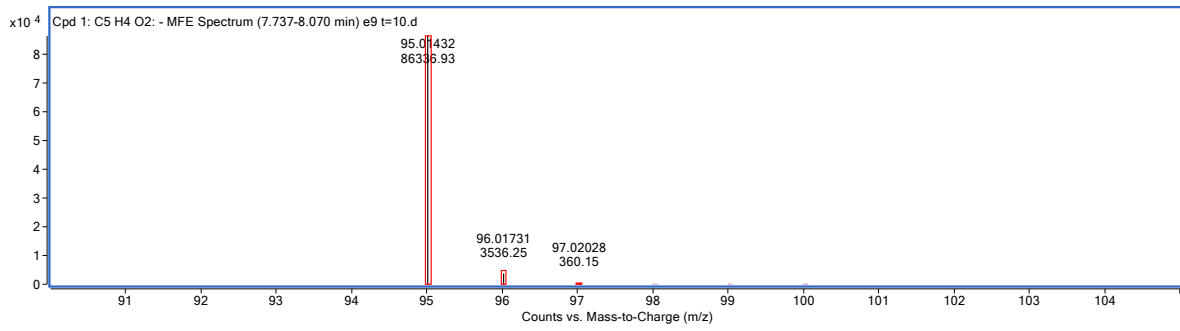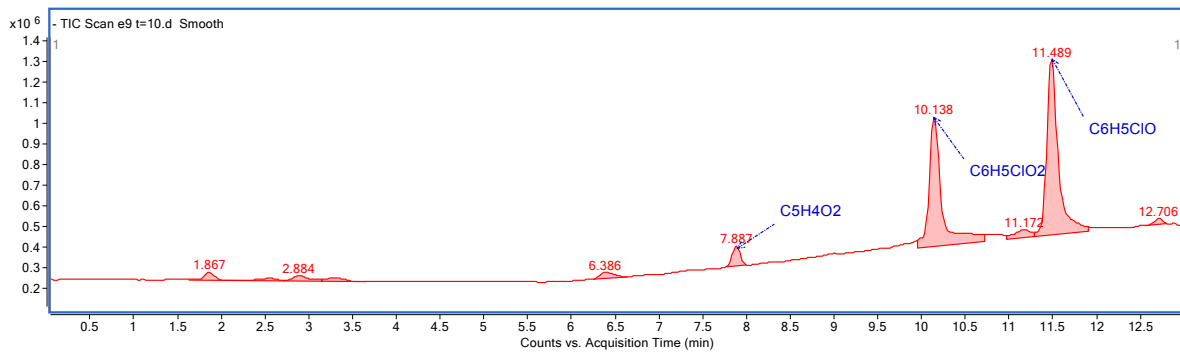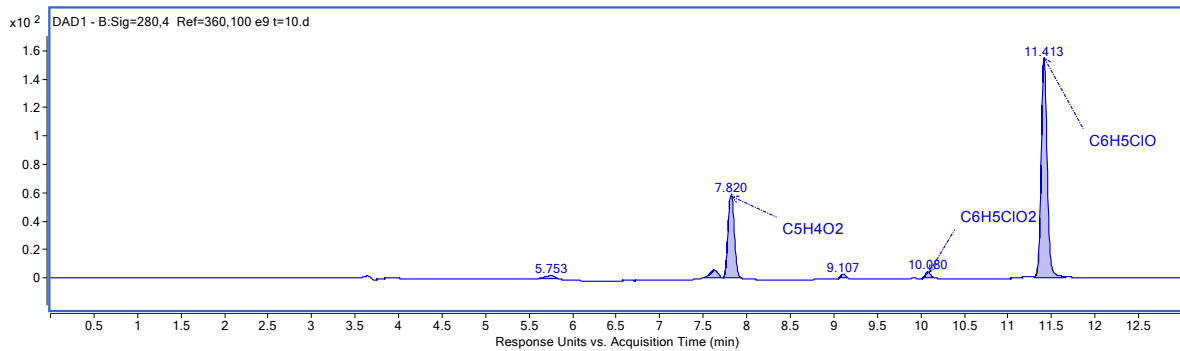

## Results for 30 minutes

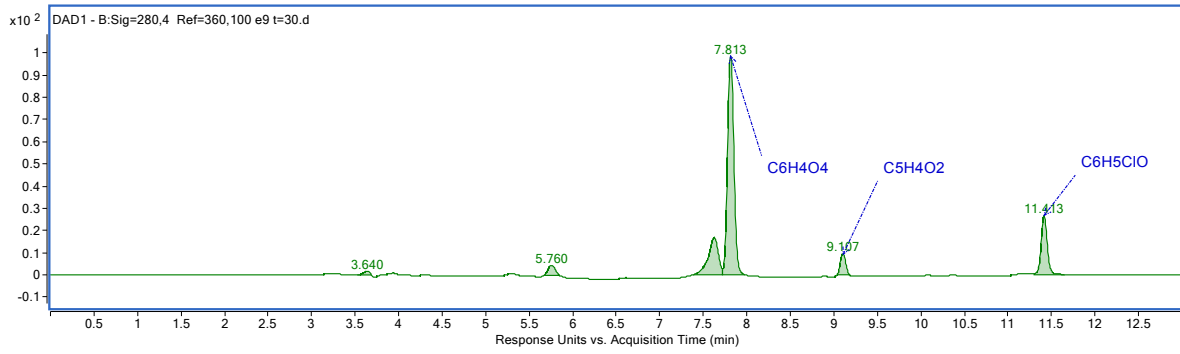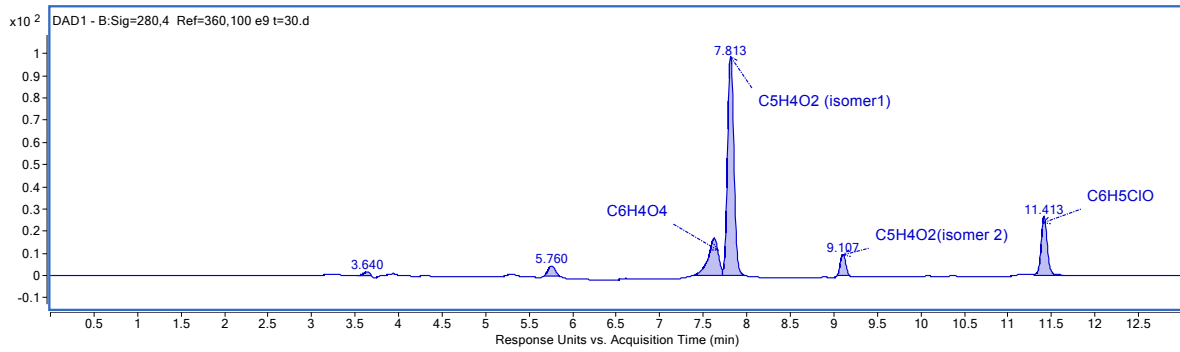

## MS spectrum of C6H4O4

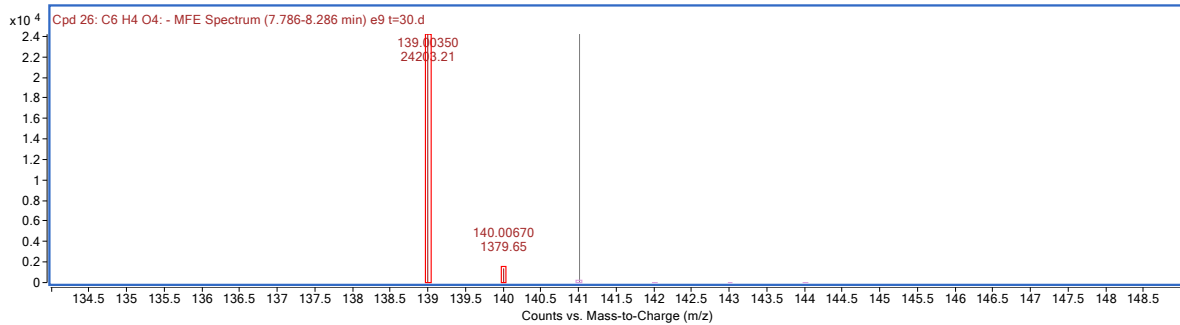

40 minutes

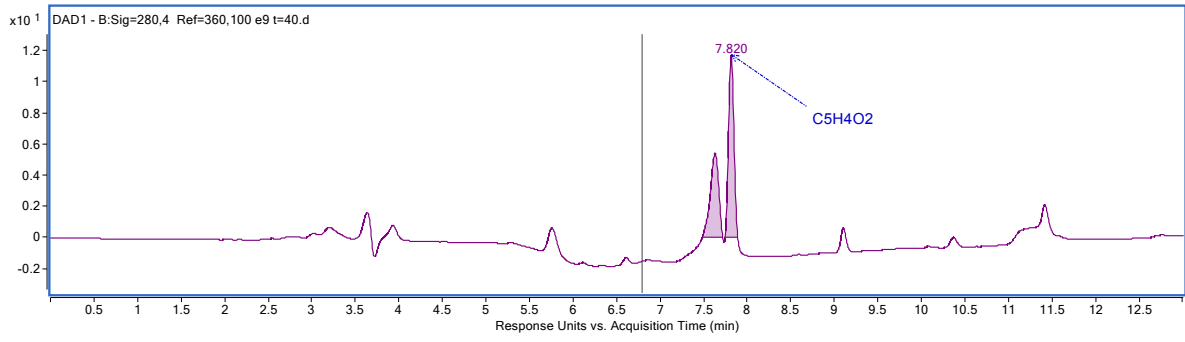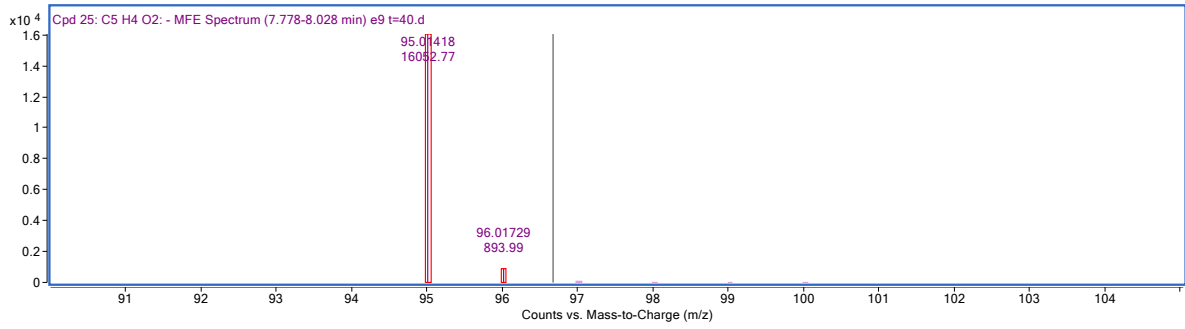

Supplement: c5ra09177b1.pdf [file c5ra09177b1.pdf]
